# Supplementary material for: Glucansucrase (mutant) enzymes from Lactobacillus reuteri 180 efficiently transglucosylate Stevia component rebaudioside A, resulting in a superior taste
Source: PubMed Central journal article supplement (PMC5784128; doi:10.1038/s41598-018-19622-5), 2018-01-24
Supplement: 41598_2018_19622_MOESM1_ESM.pdf [file 41598_2018_19622_MOESM1_ESM.pdf]

Supplementary information belonging to

**Glucansucrase (mutant) enzymes from *Lactobacillus reuteri* 180 efficiently transglucosylate *Stevia* component rebaudioside A, resulting in a superior taste**

Evelien M. te Poele<sup>a</sup>, Tim Devlamynck<sup>a,b</sup>, Manuel Jäger<sup>c</sup>, Gerrit J. Gerwig<sup>a,d</sup>, Davy Van de Walle<sup>e</sup>, Koen Dewettinck<sup>c</sup>, Anna K. H. Hirsch<sup>c</sup>, Johannis P. Kamerling<sup>a,d</sup>, Wim Soetaert<sup>b</sup> & Lubbert Dijkhuizen<sup>a</sup>

<sup>a</sup>*Microbial Physiology, Groningen Biomolecular Sciences and Biotechnology Institute (GBB), University of Groningen, Nijenborgh 7, 9747 AG Groningen, The Netherlands*

<sup>b</sup>*Centre for Industrial Biotechnology and Biocatalysis, Department of Biochemical and Microbial Technology, Faculty of Bioscience Engineering, Ghent University, Coupure Links 653, 9000 Ghent, Belgium*

<sup>c</sup>*Stratingh Institute for Chemistry, University of Groningen, Nijenborgh 7, 9747 AG Groningen, The Netherlands*

<sup>d</sup>*NMR Spectroscopy, Bijvoet Center for Biomolecular Research, Utrecht University, Padualaan 8, 3584 CH Utrecht, The Netherlands*

<sup>e</sup>*Laboratory of Food Technology and Engineering, Faculty of Bioscience Engineering, Ghent University, Coupure Links 653, 9000 Ghent, Belgium*

**Supplementary Table S1.** Survey of wild-type glucansucrase Gtf180- $\Delta$ N of *L. reuteri* 180, and mutants derived, evaluated in this study. The 3-letter code DHT represents mutating amino acid residues D1085, R1088, and N1089 to D, H, and T, respectively. The same is valid for the other mutants shown with their 3-letter codes.

| <b>mutation</b>                                                                                                    | <b>feature</b>                                   | <b>reference</b> |
|--------------------------------------------------------------------------------------------------------------------|--------------------------------------------------|------------------|
| Gtf180- $\Delta$ N                                                                                                 | wild-type; N-terminally truncated                | 31               |
| Gtf180- $\Delta$ N- $\Delta$ V                                                                                     | domain V deletion mutant                         | 32               |
| PNS (V1027P:S1137N:A1139S)                                                                                         | triple mutant                                    | 35               |
| Q1140E/A/H, S1137Y                                                                                                 | near transition state stabilizing residue D1136  | 27               |
| L940G/M/C/A/S/E/F/W                                                                                                | near acceptor subsite +1                         | 34               |
| L938A/S/F/K/M, A978F/S/G/L/P/Y, L981A/N/K,<br>D1028Y/W/L/K/G/N, N1029Y/R/G/P/T/M                                   | near acceptor subsite +1                         | 25               |
| DHT, NRL, VKG, YTS, ETL, AAA, MYM, FFF,<br>DED, LLL, D1085Y/V/A/E/H/L/Q,<br>R1088E/W/T/N/G/H/K, N1089Y/G/S/L/R/D/P | near acceptor subsite +2                         | 33               |
| W1065F/K/L/Q/G/T/E/F                                                                                               | near acceptor subsite +1 and +2                  | 26               |
| $\Delta$ V L938N                                                                                                   | L938 mutation in Gtf180- $\Delta$ N- $\Delta$ V  | unpublished      |
| $\Delta$ V L940E/F                                                                                                 | L940 mutations in Gtf180- $\Delta$ N- $\Delta$ V | 32               |

**Supplementary Table S2.** Gtf180- $\Delta$ N mutants, screened for their RebA  $\alpha$ -glucosylation potential with sucrose as donor substrate. Numbers shown here correspond to the TLC profiles (Supplementary Fig. S1). The 3-letter code DHT represents mutating amino acid residues D1085, R1088, and N1089 to D, H, and T, respectively. The same is valid for the other mutants shown with their 3-letter codes.

|            |            |            |                        |
|------------|------------|------------|------------------------|
| 1. DHT     | 21. N1089D | 41. D1085A | 61. A978S              |
| 2. NRL     | 22. N1089P | 42. D1085E | 62. A978G              |
| 3. VKG     | 23. L940G  | 43. D1085H | 63. A978L              |
| 4. YTS     | 24. L940M  | 44. D1085L | 64. A978P              |
| 5. ETL     | 25. L940C  | 45. D1085Q | 65. A978Y              |
| 6. AAA     | 26. L940A  | 46. R1088H | 66. $\Delta$ V L938N   |
| 7. MYM     | 27. L940S  | 47. R1088K | 67. $\Delta$ V L940E   |
| 8. FFF     | 28. L940E  | 48. D1028Y | 68. $\Delta$ V L940F   |
| 9. DED     | 29. L940F  | 49. D1028W | 69. W1065F             |
| 10. LLL    | 30. L940W  | 50. D1028L | 70. W1065K             |
| 11. R1088E | 31. L981A  | 51. D1028K | 71. W1065L             |
| 12. R1088W | 32. L981N  | 52. D1028G | 72. W1065Q             |
| 13. R1088T | 33. L981K  | 53. D1028N | 73. W1065G             |
| 14. R1088N | 34. L938A  | 54. N1029Y | 74. W1065T             |
| 15. R1088G | 35. L938S  | 55. N1029R | 75. W1065E             |
| 16. N1089Y | 36. L938F  | 56. N1029G | 76. W1065F             |
| 17. N1089G | 37. L938K  | 57. N1029P | 77. Gtf180- $\Delta$ N |
| 18. N1089S | 38. L938M  | 58. N1029T | - no enzyme            |
| 19. N1089L | 39. D1085Y | 59. N1029M |                        |
| 20. N1089R | 40. D1085V | 60. A978F  |                        |

**Supplementary Table S3.** Box-Behnken experimental design and results for the variables studied. Second-degree polynomial equation with coefficients of each factor is given for RebA conversion (%), RebA-G1/RebA-G (%) and amount of RebA-G synthesized (mM).  
 RebA conversion =  $85.4333 - 10.6000X_1 + 9.7500X_2 + 1.000X_3 - 5.8000X_1X_2 + 1.9000X_1X_3 + 1.1000X_2X_3 - 1.8667X_1^2 - 10.7667X_2^2 - 0.0667X_3^2$ .  
 RebA-G1/RebA-G =  $78.4333 - 0.2375X_1 - 3.5375X_2 + 1.5250X_3 + 2.1250X_1X_2 - 2.5500X_1X_3 - 0.8500X_2X_3 - 1.6292X_1^2 + 0.9708X_2^2 - 2.2542X_3^2$ .  
 RebA-G =  $106.8333 + 45.3250X_1 + 9.9750X_2 + 1.9750X_3 - 0.6750X_1X_2 + 2.7250X_1X_3 + 1.3250X_2X_3 - 10.3042X_1^2 - 12.3542X_2^2 - 1.1542X_3^2$ .  
 $X_1$ , RebA concentration (mM);  $X_2$ , D/A ratio;  $X_3$ , agitation speed (rpm).

|    | Pattern | $X_1$ | $X_2$ | $X_3$ | RebA conversion (%) | RebA-G1/RebA-G (%) | RebA-G (mM) |
|----|---------|-------|-------|-------|---------------------|--------------------|-------------|
| 1  | +0+     | 200   | 2.5   | 200   | 73.8                | 76.3               | 147.6       |
| 2  | 0-+     | 125   | 1     | 200   | 64.3                | 83.4               | 80.6        |
| 3  | -0+     | 50    | 2.5   | 200   | 94.1                | 77.2               | 47.1        |
| 4  | 0--     | 125   | 1     | 0     | 63.4                | 80                 | 79.3        |
| 5  | 0       | 200   | 4     | 100   | 66.6                | 74.8               | 133.2       |
| 6  | -0-     | 50    | 2.5   | 0     | 97                  | 67.7               | 48.6        |
| 7  | --0     | 50    | 4     | 100   | 96.5                | 75.8               | 48.3        |
| 8  | 0+-     | 125   | 4     | 0     | 82.7                | 72.6               | 103.4       |
| 9  | --0     | 50    | 1     | 100   | 67.4                | 85                 | 33.8        |
| 10 | 0       | 125   | 2.5   | 100   | 85.5                | 78.9               | 106.9       |
| 11 | +--0    | 200   | 1     | 100   | 60.7                | 75.6               | 121.4       |
| 12 | 0       | 125   | 2.5   | 100   | 85.4                | 78                 | 106.8       |
| 13 | 0       | 125   | 2.5   | 100   | 85.4                | 78.5               | 106.8       |
| 14 | 0++     | 125   | 4     | 200   | 88                  | 72.2               | 110         |
| 15 | +0-     | 200   | 2.5   | 0     | 69.1                | 77                 | 138.2       |

**Supplementary Table S4.**  $^1\text{H}$  and  $^{13}\text{C}$  chemical shifts ( $\delta$ )<sup>a</sup> for the Glcp residues of RebA and RebA-G1, recorded in D<sub>2</sub>O at 310 K. For structures, see Fig. 5 (main text).

| Unit                                                         | RebA         |                 | RebA-G1      |                   | Unit                                                       | RebA         |                 | RebA-G1      |                 |
|--------------------------------------------------------------|--------------|-----------------|--------------|-------------------|------------------------------------------------------------|--------------|-----------------|--------------|-----------------|
|                                                              | $^1\text{H}$ | $^{13}\text{C}$ | $^1\text{H}$ | $^{13}\text{C}$   |                                                            | $^1\text{H}$ | $^{13}\text{C}$ | $^1\text{H}$ | $^{13}\text{C}$ |
| <b>Glc1(<math>\beta</math>1<math>\rightarrow</math>C-19)</b> |              |                 |              |                   | <b>Glc4(<math>\beta</math>1<math>\rightarrow</math>3)</b>  |              |                 |              |                 |
| H-1                                                          | 5.40         | 95.6            | 5.41         | 95.7              | H-1                                                        | 4.70         | 103.7           | 4.70         | 103.8           |
| H-2                                                          | 3.43         | 73.6            | 3.44         | 73.6              | H-2                                                        | 3.32         | 75.0            | 3.31         | 75.1            |
| H-3                                                          | 3.50         | 78.0            | 3.49         | 77.9              | H-3                                                        | 3.45         | 77.5            | 3.45         | 77.6            |
| H-4                                                          | 3.41         | 70.9            | 3.47         | 71.1              | H-4                                                        | 3.35         | 71.0            | 3.35         | 71.0            |
| H-5                                                          | 3.50         | 77.9            | 3.68         | 77.0              | H-5                                                        | 3.33         | 77.5            | 3.32         | 77.5            |
| H-6a                                                         | 3.82         | 62.3            | 3.87         | 67.1 <sup>b</sup> | H-6a                                                       | 3.85         | 62.9            | 3.85         | 62.8            |
| H-6b                                                         | 3.67         |                 | 3.69         |                   | H-6b                                                       | 3.65         |                 | 3.66         |                 |
| <b>Glc2(<math>\beta</math>1<math>\rightarrow</math>C-13)</b> |              |                 |              |                   | <b>Glc5(<math>\alpha</math>1<math>\rightarrow</math>6)</b> |              |                 |              |                 |
| H-1                                                          | 4.71         | 97.6            | 4.70         | 97.5              | H-1                                                        | -            | -               | 4.86         | 99.4            |
| H-2                                                          | 3.68         | 80.3            | 3.67         | 80.5              | H-2                                                        | -            | -               | 3.47         | 73.1            |
| H-3                                                          | 3.81         | 86.7            | 3.82         | 87.0              | H-3                                                        | -            | -               | 3.66         | 74.9            |
| H-4                                                          | 3.46         | 70.4            | 3.46         | 70.5              | H-4                                                        | -            | -               | 3.35         | 71.0            |
| H-5                                                          | 3.45         | 77.5            | 3.44         | 77.5              | H-5                                                        | -            | -               | 3.63         | 73.3            |
| H-6a                                                         | 3.83         | 62.5            | 3.84         | 62.5              | H-6a                                                       | -            | -               | 3.75         | 62.1            |
| H-6b                                                         | 3.67         |                 | 3.67         |                   | H-6b                                                       | -            |                 | 3.65         |                 |
| <b>Glc3(<math>\beta</math>1<math>\rightarrow</math>2)</b>    |              |                 |              |                   |                                                            |              |                 |              |                 |
| H-1                                                          | 4.80         | 103.5           | 4.80         | 103.6             |                                                            |              |                 |              |                 |
| H-2                                                          | 3.21         | 76.0            | 3.20         | 75.9              |                                                            |              |                 |              |                 |
| H-3                                                          | 3.41         | 77.4            | 3.41         | 77.5              |                                                            |              |                 |              |                 |
| H-4                                                          | 3.26         | 71.9            | 3.25         | 72.0              |                                                            |              |                 |              |                 |
| H-5                                                          | 3.33         | 77.5            | 3.33         | 77.5              |                                                            |              |                 |              |                 |
| H-6a                                                         | 3.81         | 63.0            | 3.81         | 62.9              |                                                            |              |                 |              |                 |
| H-6b                                                         | 3.61         |                 | 3.61         |                   |                                                            |              |                 |              |                 |

<sup>a</sup> In ppm relative to the signal of internal acetone ( $\delta$  2.225 for  $^1\text{H}$  and  $\delta$  31.07 for  $^{13}\text{C}$ ).

<sup>b</sup> Substituted carbon positions are indicated in italics.

**Supplementary Table S5.** Methylation analysis of the carbohydrate moieties in RebA and  $\alpha$ -glucosylated RebA products RebA-G and RebA-G1.  $R_t$ , retention time relative to 1,5-di-*O*-acetyl-2,3,4,6-tetra-*O*-methylglucitol (1.00) on GLC; 2,3,4,6-Hex = 1,5-di-*O*-acetyl-2,3,4,6-tetra-*O*-methylglucitol-1-*d*. etc.; tr = trace (<2%).

| Alditol acetate | $R_t$ | Structural feature | Peak area (%) |        |         |
|-----------------|-------|--------------------|---------------|--------|---------|
|                 |       |                    | RebA          | RebA-G | RebA-G1 |
| 2,3,4,6-Hex     | 1.00  | Glc $p$ (1→        | 74            | 58     | 61      |
| 2,4,6-Hex       | 1.16  | →3)Glc $p$ (1→     | -             | 3      | -       |
| 3,4,6-Hex       | 1.18  | →4)Glc $p$ (1→     | -             | tr     | tr      |
| 2,3,4-Hex       | 1.22  | →6)Glc $p$ (1→     | -             | 17     | 18      |
| 4,6-Hex         | 1.32  | →2,3)Glc $p$ (1→   | 26            | 20     | 21      |
| 2,4-Hex         | 1.39  | →3,6)Glc $p$ (1→   | -             | 2      | -       |

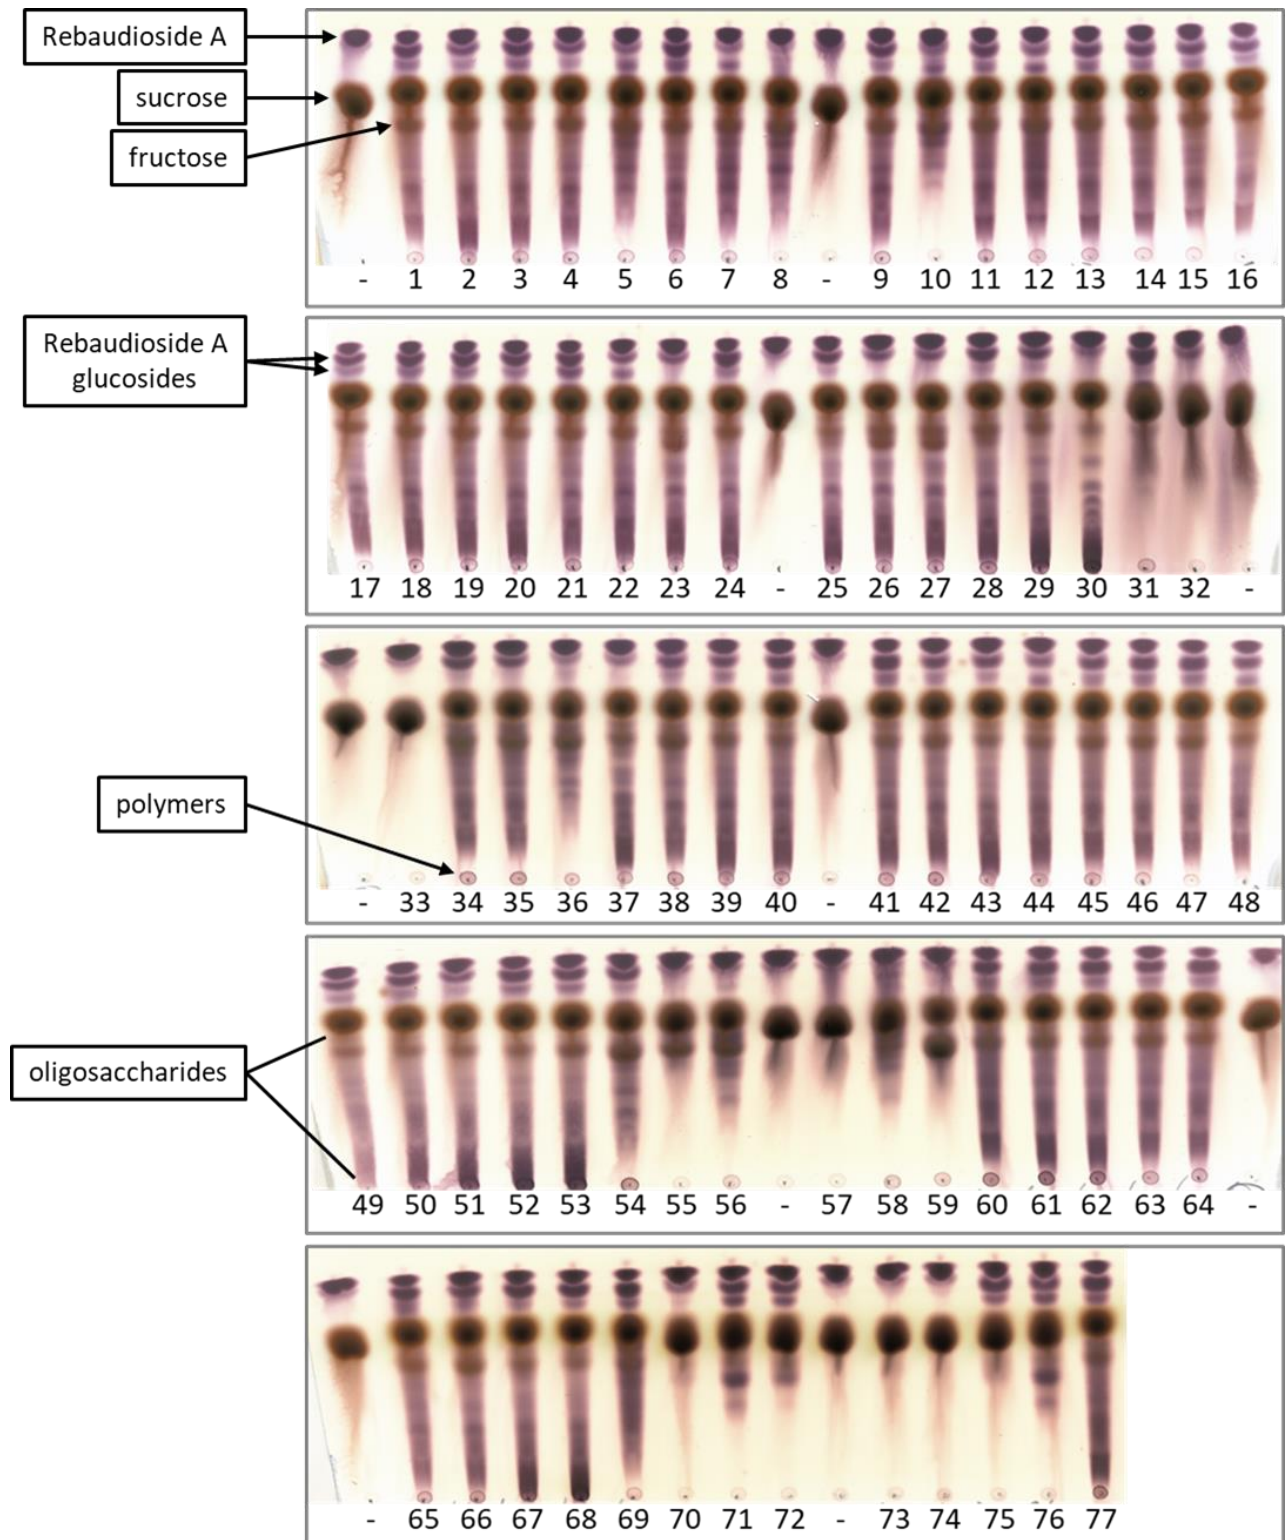

**Supplementary Figure S1.** TLC substrate/product profiles after a 3-h incubation at 37 °C of a buffer solution (pH 4.7) containing 50 mM RebA, 0.2 M sucrose and ~1 mg/mL wild-type Gtf180-ΔN (lane 77) or Gtf180-ΔN mutant enzymes (see Supplementary Table S1 and Table S2).

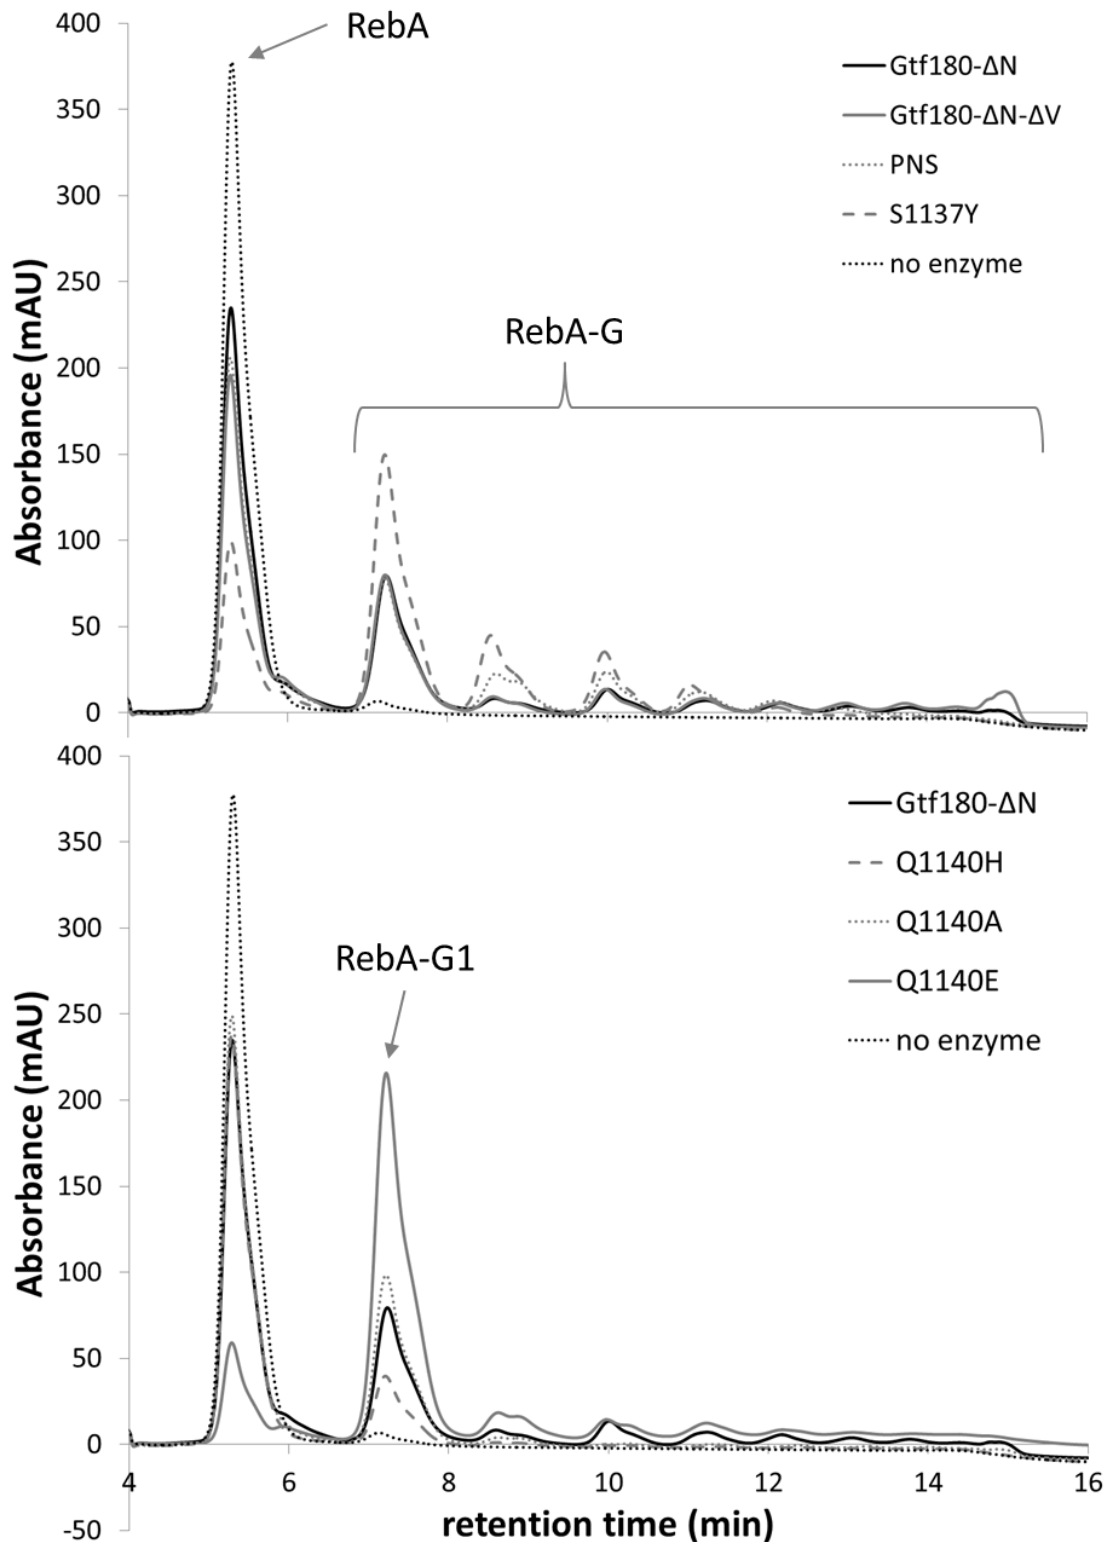

**Supplementary Figure S2.** HPLC substrate/product profiles after a 3-h incubation at 37 °C of a buffer solution (pH 4.7) containing 50 mM RebA, 1 M sucrose and ~1 mg/mL wild-type Gtf180- $\Delta$ N, wild-type Gtf180- $\Delta$ N- $\Delta$ V or Gtf180- $\Delta$ N mutant enzymes. RebA-G: total amount of  $\alpha$ -glucosylated RebA product. RebA-G1: mono- $\alpha$ -glucosylated RebA.



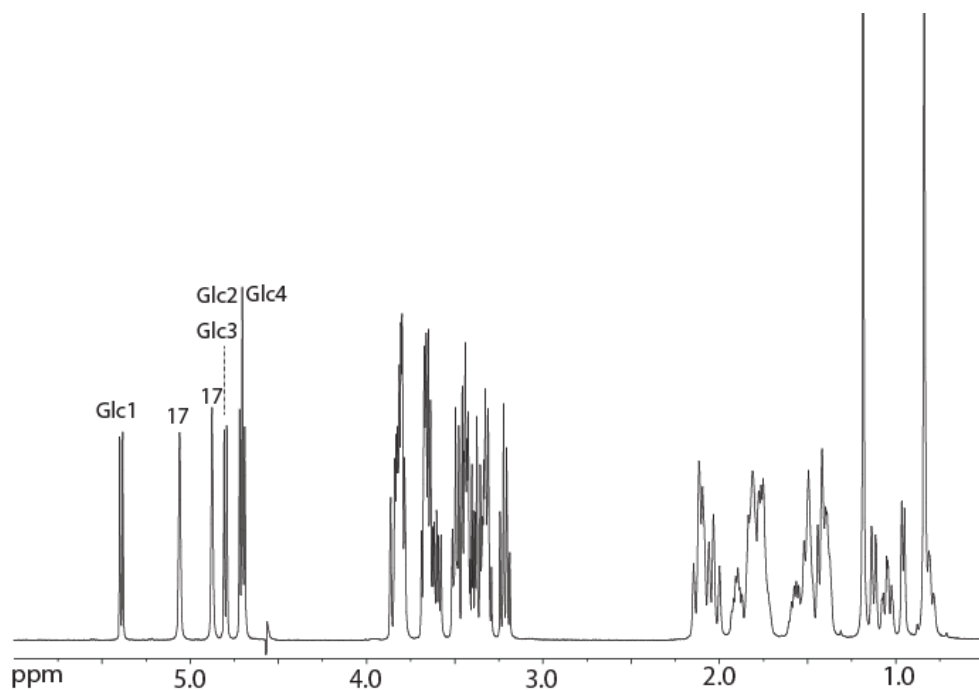

**Supplementary Figure S3.** 500-MHz  $^1\text{H}$  NMR spectrum of commercial RebA, supplied by Tereos PureCircle, recorded in  $\text{D}_2\text{O}$  at 310K. The positions of the anomeric protons of the glucose residues (see Fig. 3) are indicated, as well as the steviol C-17 protons in the anomeric region. The spectrum is identical to that of commercial RebA, supplied by Aldrich-Sigma Chemie, and recently published with a complete assignment of resonances<sup>23</sup>.

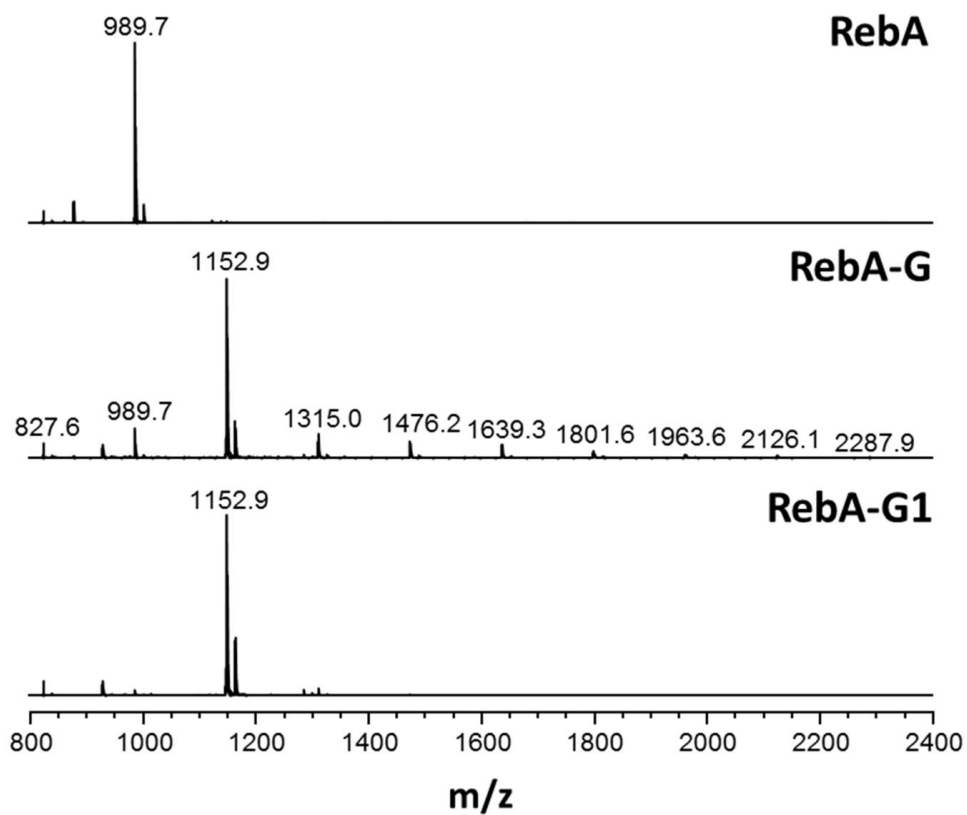

**Supplementary Figure S4.** MALDI-TOF mass spectra of RebA, RebA-G and RebA-G1.

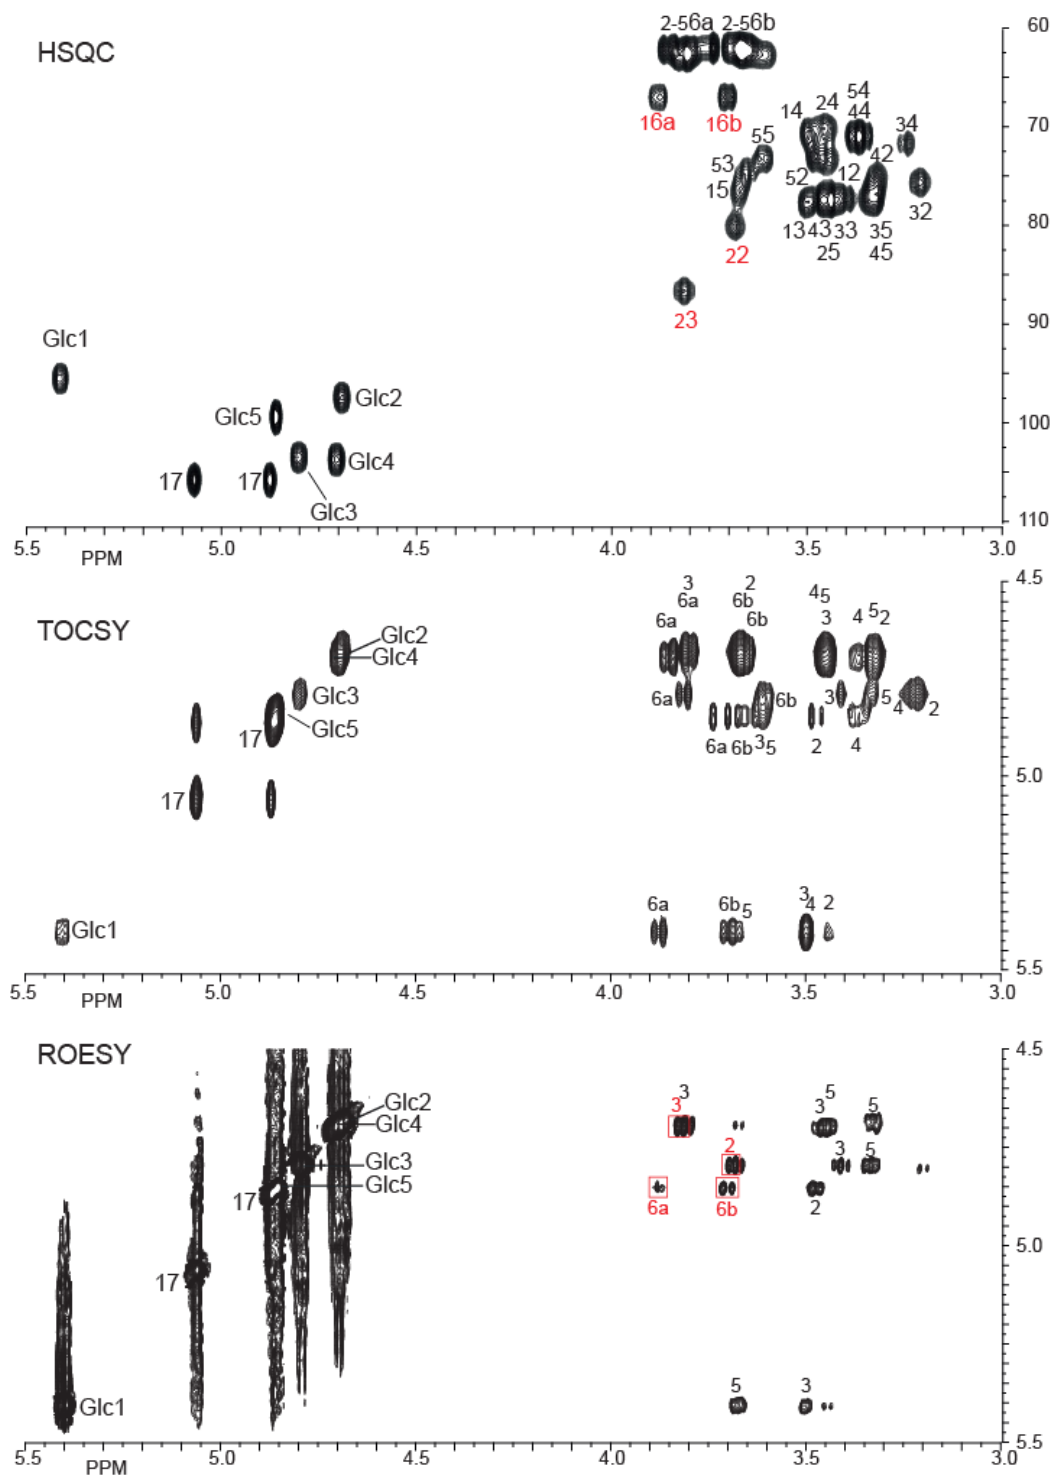

**Supplementary Figure S5.** HSQC, TOCSY (mixing time 200 ms) and ROESY spectra of the carbohydrate part of RebA-G1, recorded in  $\text{D}_2\text{O}$  at 310 K. In the HSQC spectrum, 23 means cross-peak H-3/C-3 of residue **Glc2**, etc.; assignments in red reflect the substituted positions of the residues. In the ROESY spectrum, the inter-residual cross-peaks confirming the **Glc4( $\beta$ 1 $\rightarrow$ 3)Glc2**, **Glc3( $\beta$ 1 $\rightarrow$ 2)Glc2** and **Glc5( $\alpha$ 1 $\rightarrow$ 6)Glc1** linkages are indicated with red boxes.
